# Supplementary material for: Surface domain heterojunction on rutile TiO2 for highly efficient photocatalytic hydrogen evolution
Source: Royal Society of Chemistry journal article supplement (doi:10.1039/d0nh00491j), 2020-01-01
Supplement: d0nh00491j1.pdf [file d0nh00491j1.pdf]

## Electronic Supplementary Information

### Surface Domain Heterojunction on Rutile TiO<sub>2</sub> for High-Efficient Photocatalytic Hydrogen Evolution

*Kuo Lin,<sup>‡</sup> Fang Xiao,<sup>‡</sup> Ying Xie, Kai Pan, Lei Wang, Wei Zhou,<sup>\*</sup> and Honggang Fu<sup>\*</sup>*

Key Laboratory of Functional Inorganic Material Chemistry, Ministry of Education of the People's Republic of China, Heilongjiang University, Harbin, 150080, P. R. China

E-mail: zwchem@hotmail.com

fuhg@vip.sina.com

#### Characterizations

X-ray diffraction (XRD) patterns were obtained by a Bruker D8 Advance diffractometer by using Cu K<sub>α</sub> radiation ( $\lambda = 1.5406 \text{ \AA}$ , 40 kV, 40 mA). The scan rate and the step size were 6 °/min and 0.02 °, respectively. Raman measurements were performed with a Jobin Yvon HR 800 micro-Raman spectrometer at 457.9 nm. The laser beam was focused with a 50 × objective lens to a ca. 1 μm spot on the surface of the sample. The surface morphology was measured by scanning electron microscopy (SEM, Hitachi S-4800, with an acceleration voltage of 5 kV) and transmission electron microscopy (TEM, JEOL

JEM-2100). X-ray photoelectron spectroscopy (XPS, Kratos, ULTRA AXIS DLD) was carried out with monochrome Al  $K_{\alpha}$  ( $h\nu = 1486.6$  eV) radiation. All binding energies were calibrated by referencing to C 1s peak at 284.6 eV. UV-visible absorption spectroscopy was recorded using a UV-visible spectrophotometer (Shimadzu UV-2550). The band gaps were estimated by extrapolating a linear part of the plots to  $(\alpha h\nu)^2 = 0$ . Scanning Kelvin probe (SKP) measurements (SKP5050 system, Scotland) were performed at normal laboratory conditions. Surface photovoltage spectroscopy (SPS) measurements were carried out with a home-built apparatus equipped with a lock-in amplifier (SR830) synchronized with a light chopper (SR540). The photoluminescence spectra (PL) were recorded with a PELS 55 spectrofluoro-photometer with the excitation wavelength of 325 nm. The loading amount of Pt was according to Inductively Coupled Plasma (Optima 8300 (PerkinElmer, USA) ICP-OES). Fourier transform infrared spectroscopy (FT-IR) was recorded on a Perkin-Elmer Spectrum One spectrometer using KBr pellets. Nitrogen adsorption-desorption isotherms at 77 K were collected on an AUTOSORB-1 nitrogen adsorption apparatus. Surface area was estimated by Brunauer–Emmett–Teller (BET) method and pore-size distribution was measured from the adsorption branch of the isotherm using the Barrett-Joyner-Halenda (BJH) method. The positron annihilation experiments were carried out on EG&G ORTEC fast slow coincidence system with a resolution of 210 ps. The tablet was folded to surround the positron source ( $^{22}\text{Na}$ ,  $5 \times 10^5$  Bq) with a total thickness of approximately 1 mm. The spectrum was resolved using the LTV9.0 software. Electron paramagnetic resonance

trapping measurement was as follows. 20 mg samples were dissolved in 5 ml DI water or methanol, then 50  $\mu\text{L}$  solution was mixed with 500  $\mu\text{L}$  5,5-dimethyl-1-pyrroline-N-oxide (DMPO). After being illuminated for 15 s (Xe lamp with AM 1.5G), the mixture was characterized using a Bruker EMX plus model spectrometer operating at room temperature.

### **Water Contact Angle Measurement**

Hydrophilicity was evaluated using a water contact angle (WCA) by static droplet method (sessile drop method), on a drop shape instrument (FTA1000, First Ten Angstroms). Immediately after preparation of the film (spray coating), 4  $\mu\text{L}$  of distilled water was deposited on the specimen, and WCA after 10 s was measured by the curve fitting method of elliptic approximation.

### **Photocatalytic hydrogen evolution**

The photocatalytic hydrogen evolution experiments were conducted in an online photocatalytic hydrogen generation system (AuLight, CEL-SPH2N, Beijing PerfectLight) at ambient temperature. Typically, 100 mg of the photocatalysts were dispersed in 100 mL of the mixed solution made of DI water and methanol (4:1). The suspension of photocatalysts was sealed in the closed-gas circulation reaction cell. Prior to the reaction, the mixture was deaerated by evacuation to remove  $\text{O}_2$  and  $\text{CO}_2$  dissolved in water. Subsequently, the reactor was exposed under a 300 W Xe lamp (Oriel, USA). Gas evolution was observed under AM 1.5G irradiation with a power density of  $100 \text{ mW cm}^{-2}$

and being analyzed by an on-line gas chromatograph (SP7800, TCD, molecular sieve 5 Å, N<sub>2</sub> carrier, Beijing Keruida Limited). The determination of the apparent quantum efficiency for hydrogen generation was performed using the same closed circulating system under illumination of a 300 W Xe lamp with bandpass filter (365 and 420 nm) system.

### **Photoelectrochemical test**

Photoelectrochemical measurements were monitored by a CorrTest electrochemical station with a standard three-electrode system. The working electrodes were prepared by using samples coated on FTO glass. Pt plate and Ag/AgCl (saturated KCl) electrode were used as the counter electrode and reference electrode, respectively. The electrolyte was Na<sub>2</sub>SO<sub>4</sub> solution (0.5 M) and purged with nitrogen for 3 h before measurement. All photoelectrochemical experiments were carried out under AM 1.5G irradiation.

### **The apparent quantum efficiency (AQY) and the solar-to-hydrogen (STH) efficiency**

The apparent quantum efficiency (AQE) was calculated under different single-wavelength light using Equation (1):

$$\text{AQE} = \frac{2 \times \text{the number of evolved H}_2 \text{ molecules}}{\text{then umber of incident photons}} \times 100\% \quad (1)$$

The solar to hydrogen (STH) conversion efficiency were calculated from the solar simulator measurements using Equation (2):

$$\text{STH} = \frac{\text{output energy}}{\text{Energy of incidence solar light}} = \frac{r_{\text{H}_2} \Delta G}{P_{\text{sun}} \times S} \times 100\% \quad (2)$$

### Turn-Over-Frequency (TOF) calculations

The TOF was calculated under AM 1.5G irradiation using Equation (3):

$$\text{TOF} = \frac{\text{mole of evolved H}_2}{\text{mole of Pt atoms of catalyst} \times \text{reaction time}} \quad (3)$$

### Density functional theory calculations

Density functional theory calculations were carried out by using the CASTEP code [S. J. Clark, M. D. Segall, C. J. Pickard, P. J. Hasnip, M. J. Probert, K. Refson, M. C. Payne, *Zeitschrift fuer Kristallographie*. **2005**, 220(5-6), 567]. Generalized Gradient Approximation (GGA) and Perdew-Wang functional (PW) [J. P. Perdew, Y. Wang, *Phys. Rev. B*. **1992**, 45, 13244] were applied to deal with the exchange correlation energy. With the application of the ultra-soft pseudo-potential technique [D. Vanderbilt, *Phys. Rev. B*, **1990**, 41, 7892-7895], the energy cut-off was set to 380 eV. A (4×4×1) grid was used when sampling over Brillouin zone. The (2×1×1) supercell of TiO<sub>2</sub> (110) surface was constructed and depicted in **Scheme S1**. Geometry optimization was performed with the application of the Broyden-Fletcher-Goldfarb-Shanno algorithm (BFGS) [B. G. Pfrommer, M. Cote, S. G. Louie, M. L. Cohen, *J. Comput. Phys.* **1997**, 131, 233-240] until the stress, the force, and the displacement on each atom were less than 0.02 Gpa, 0.01 eV·Å<sup>-1</sup> and 5.0×10<sup>-4</sup> Å, respectively. Under such conditions, the energy convergence of systems is restricted within 2.0×10<sup>-6</sup> eV·atom<sup>-1</sup>. Furthermore, to evaluate the HER performance of the materials, the Gibbs adsorption energy of a single H atom on different

surfaces ( $\Delta G_{H^*}$ ) was calculated according to Ref. [Y. Zheng, Y. Jiao, Y. Zhu, L. Li, Y. Han, Y. Chen, A. J. Du, M. Jaroniec, S. Qiao, *Nat. Commun.* **2014**, *5*, 3783; H. Yan, Y. Xie, A. Wu, Z. Cai, L. Wang, C. Tian, X. Zhang, H. Fu, *Adv. Mater.* **2019**, *31*, 1901174]. To avoid the pseudo-interaction between periodic images along z axis, a vacuum slab with the thickness of 15 Å was introduced.

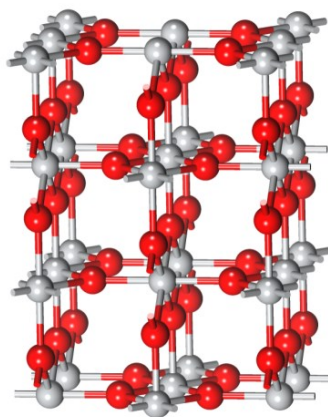

**Scheme S1.** Scheme of rutile  $\text{TiO}_2$  (110) surface with  $(2 \times 1 \times 1)$  supercell.

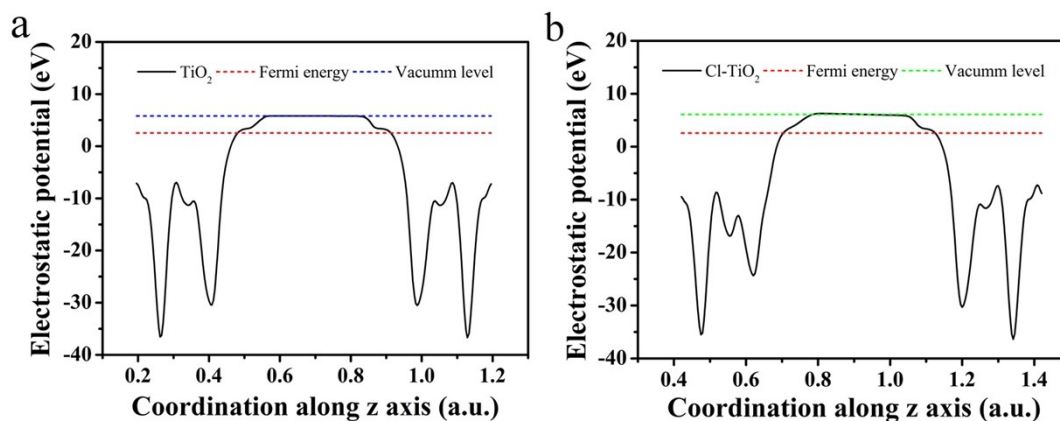

**Figure S1.** Average electrostatic potentials along z axis for rutile  $\text{TiO}_2$  (a) and Cl-decorated rutile  $\text{TiO}_2$  surface (b), respectively.

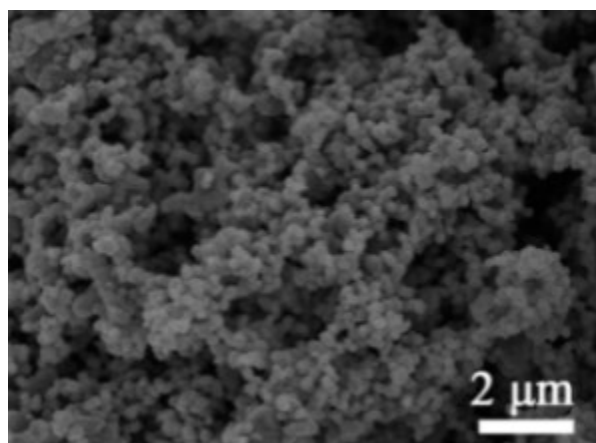

**Figure S2.** SEM image of titania oligomers particles as seeds.

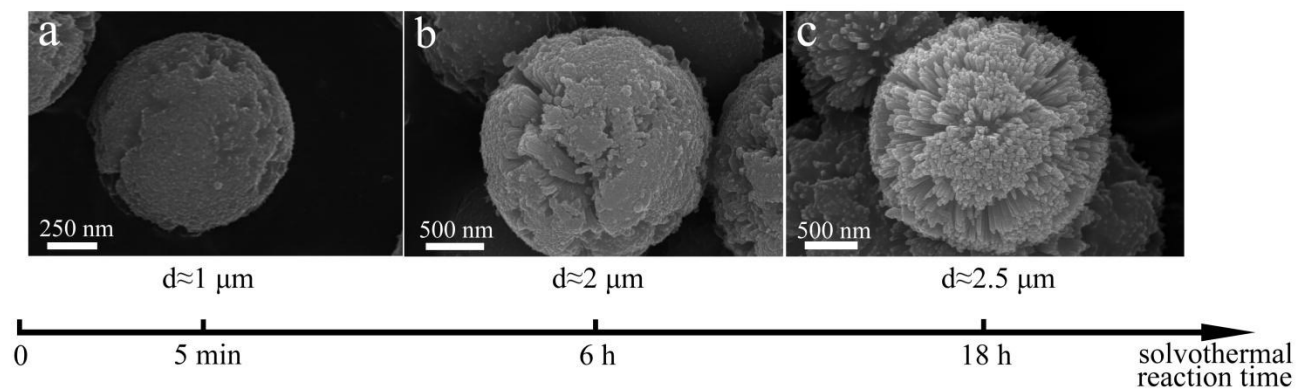

**Figure S3.** SEM images of the growth process of rutile  $\text{TiO}_2$  microsphere at different reaction times: (a) 5 min; (b) 6 h; (c) 18 h.

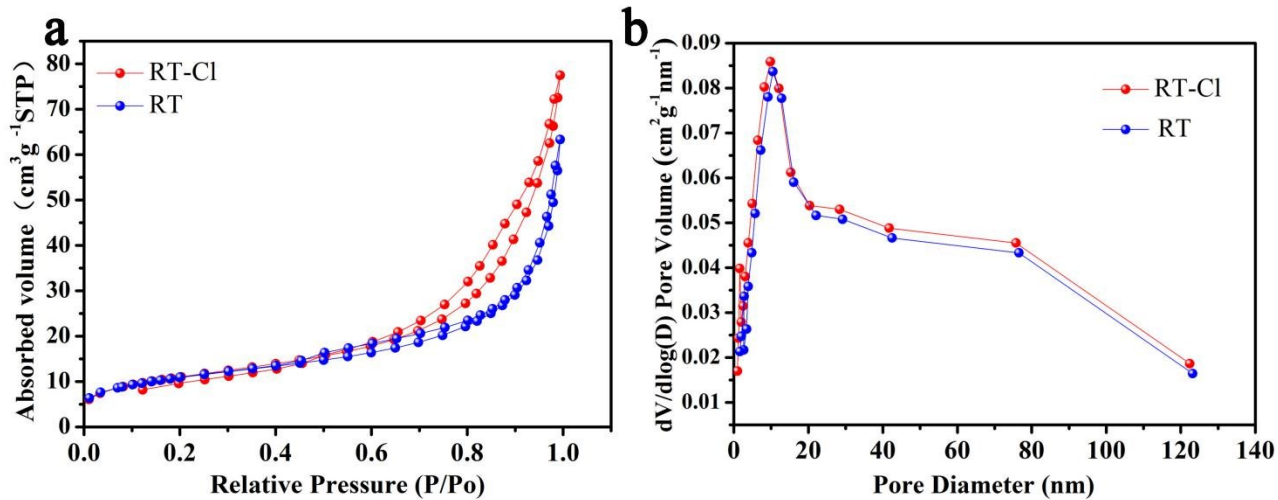

**Figure S4.** N<sub>2</sub> adsorption-desorption isotherms (a) and the corresponding pore size distributions (b) of RT and RT-Cl, respectively.

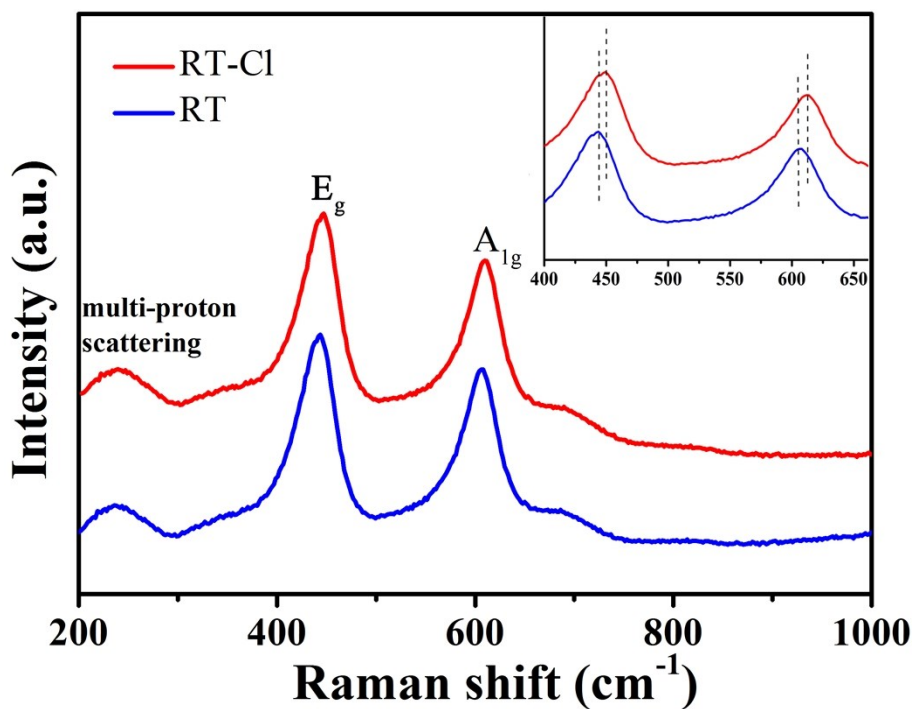

**Figure S5.** Raman spectra of RT and RT-Cl, respectively. The inset is the enlarged spectra between 400-660 cm<sup>-1</sup>.



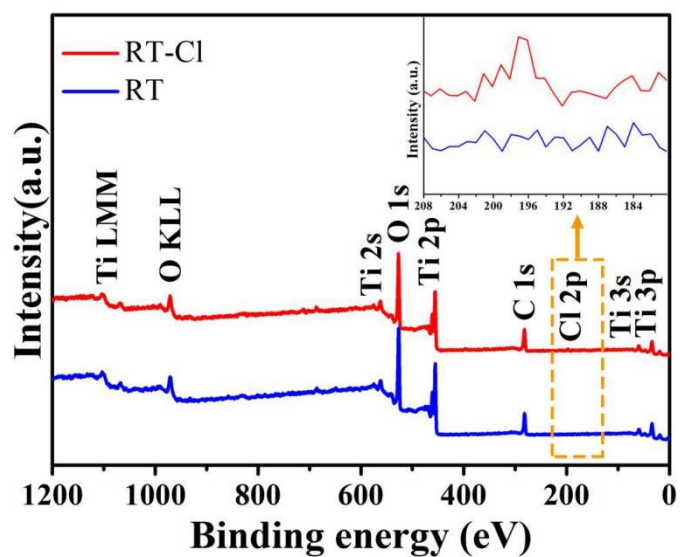

**Figure S6.** XPS survey spectra of RT and RT-Cl, respectively. The inset is the enlarged spectra between 180-208 eV.

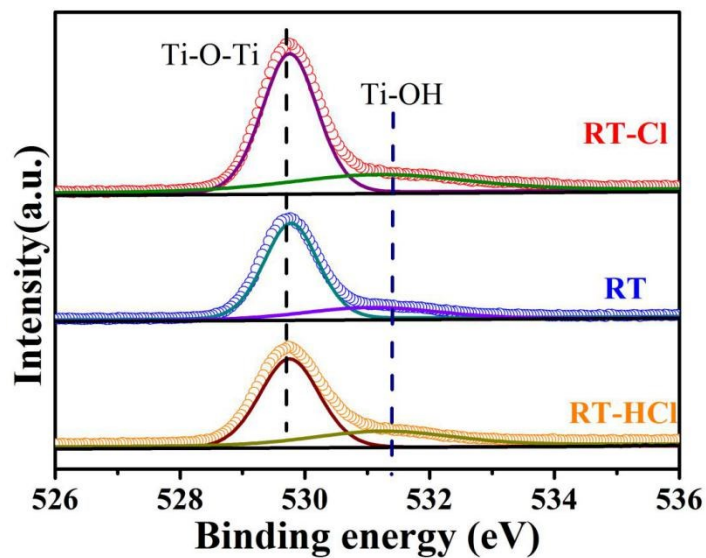

**Figure S7.** XPS spectra of O 1s for RT, RT-Cl and RT-HCl samples, respectively.

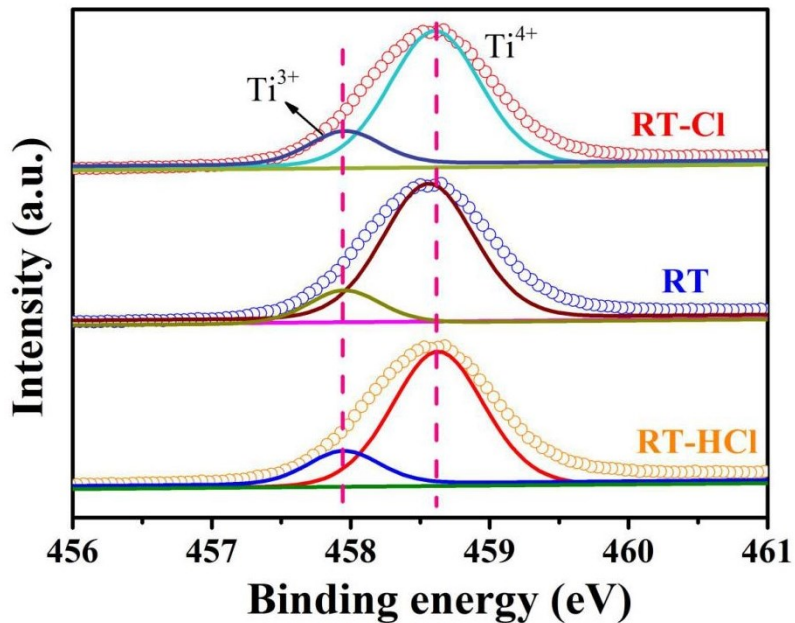

**Figure S8.** XPS spectra of Ti 2p for RT, RT-Cl and RT-HCl samples, respectively.

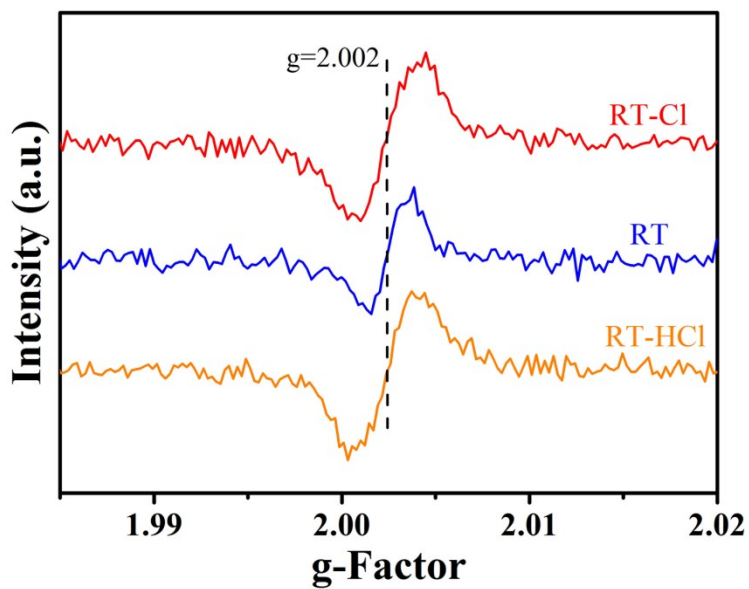

**Figure S9.** Electron paramagnetic resonance spectra of RT-Cl, RT, and RT-HCl, respectively.

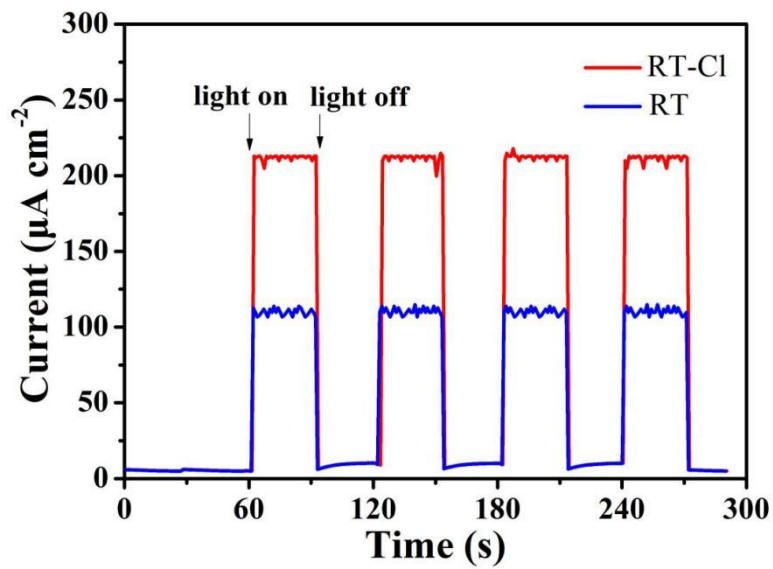

Figure S10. Chronoamperometry responses of RT and RT-Cl, respectively.

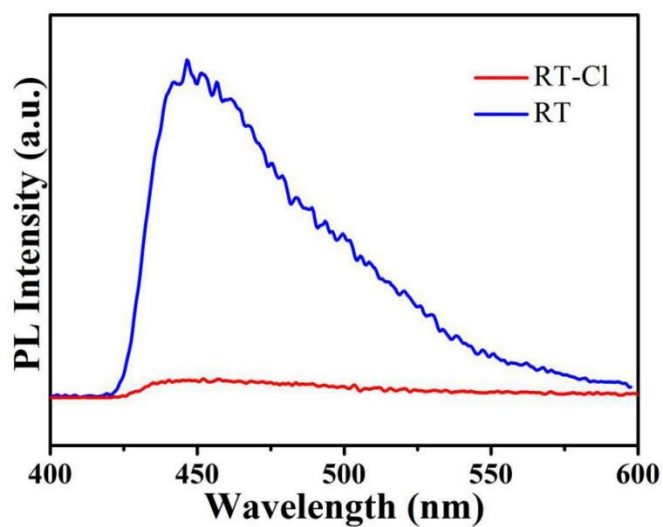

Figure S11. PL spectra of RT and RT-Cl, respectively.

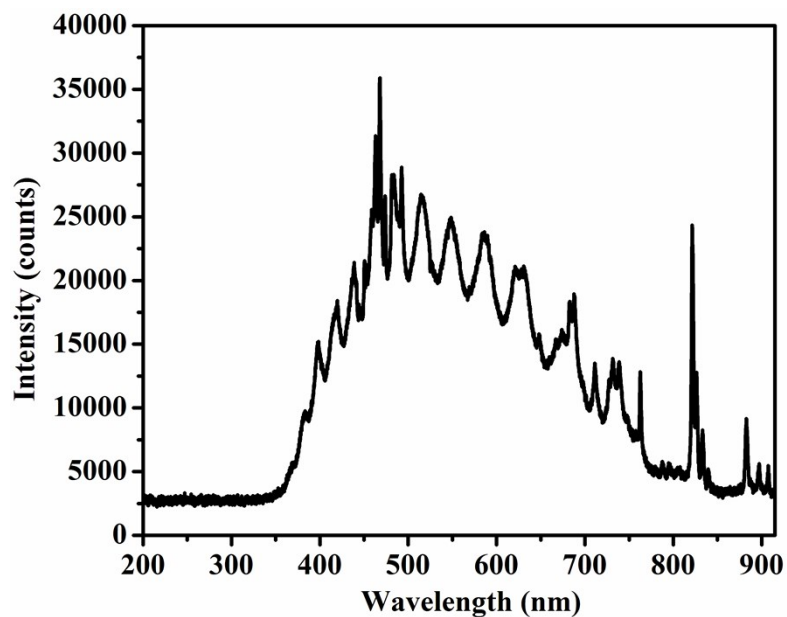

**Figure S12.** The UV-vis spectrum of solar simulator equipped with an AM 1.5G filter.

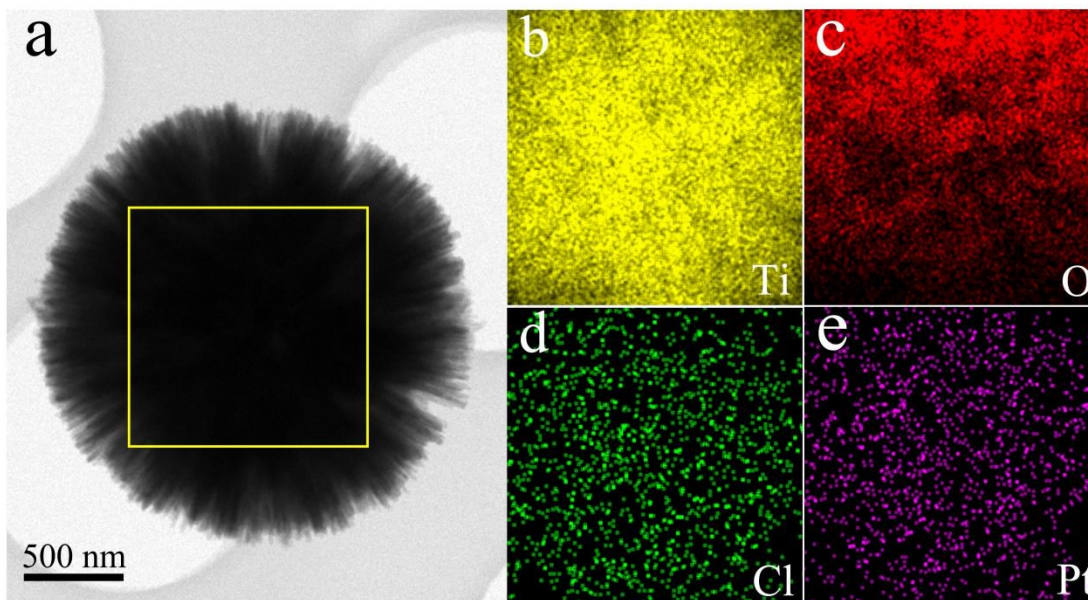

**Figure S13.** The TEM image (a) and the corresponding EDX mapping images of elemental Ti (b), O (c), Cl (d), and Pt (e) in the selected area in panel of RT-Cl.

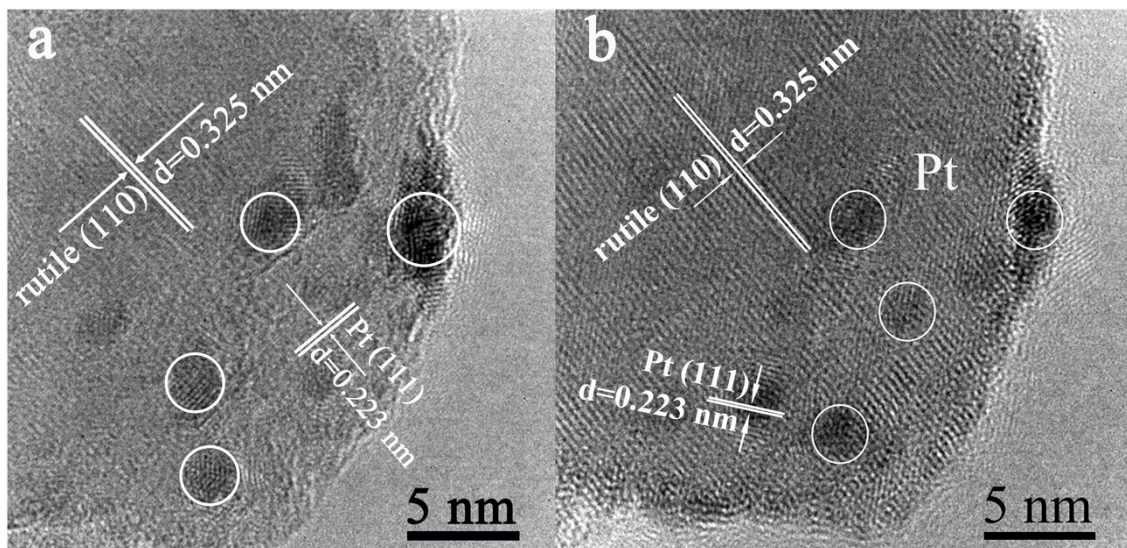

**Figure S14.** HRTEM images of RT (a) and RT-Cl (b) with Pt nanoparticles as co-catalyst (the main diameter of 2~3 nm).

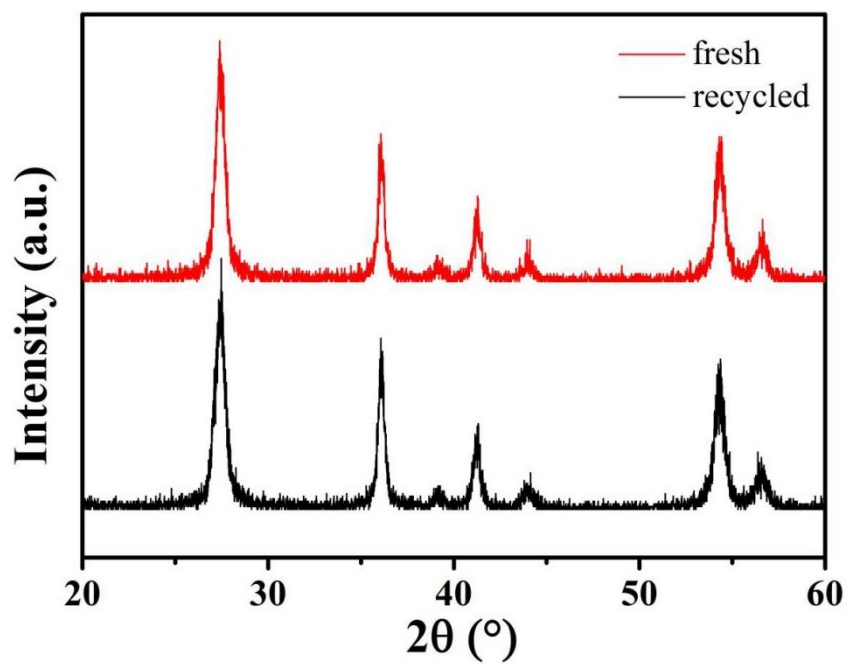

**Figure S15.** XRD patterns of fresh sample (RT-Cl) and the sample after 5 cycles.



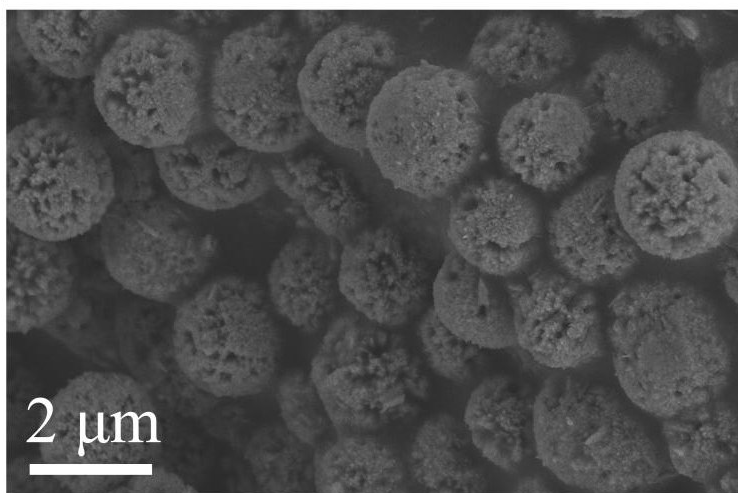

**Figure S16.** SEM image of the RT-Cl sample after 5 recycles.

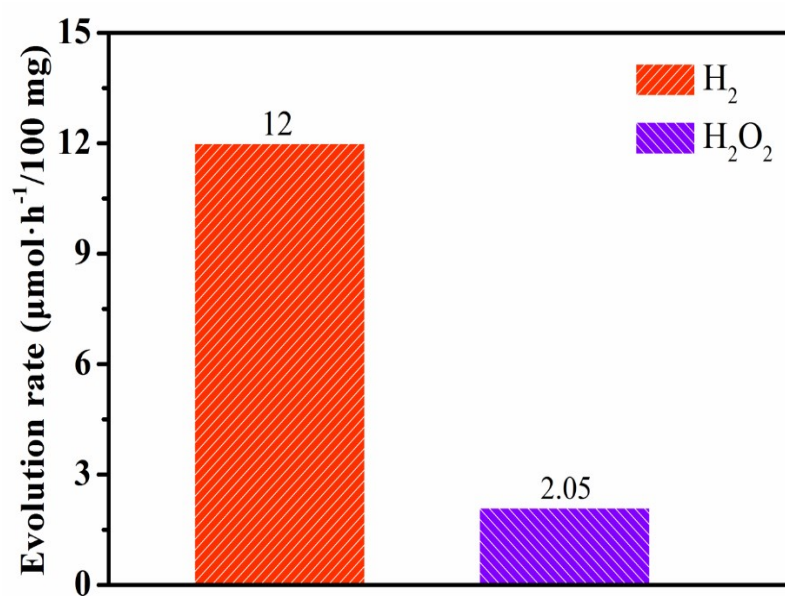

**Figure S17.** H<sub>2</sub> and H<sub>2</sub>O<sub>2</sub> evolution rates of RT-Cl sample for pure water splitting.

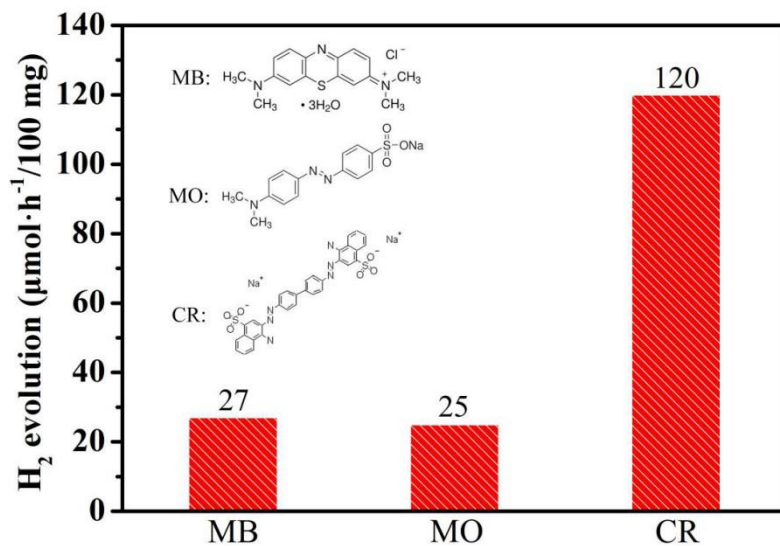

**Figure S18.** Photocatalytic hydrogen evolution of RT-Cl in Methylene Blue (MB), Methyl Orange (MO), and Congo Red (CR) aqueous solutions ( $20\text{ mg L}^{-1}$ ).

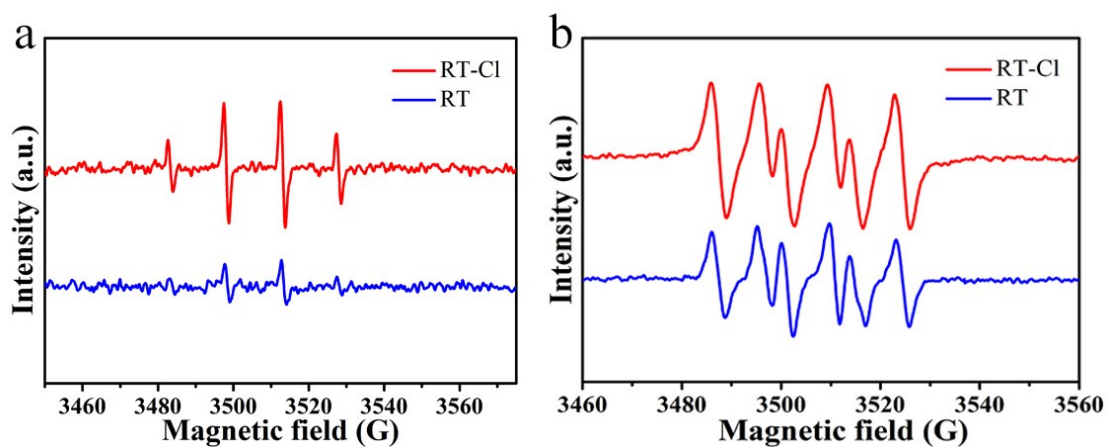

**Figure S19.** EPR spectra in the presence of DMPO in water (a) and in  $\text{CH}_3\text{OH}$  (b), respectively.

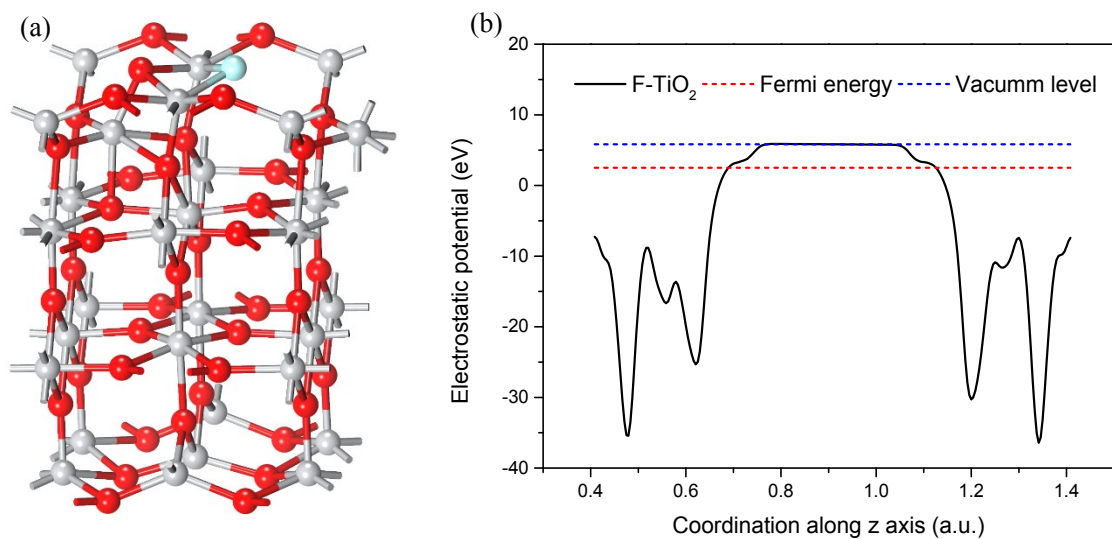

**Figure S20.** Optimized structure for F-decorated rutile  $\text{TiO}_2$  surface (a) and the electrostatic potential along z axis (b).

To clarify whether the SDH mechanism is applicable or not for F-decorated rutile  $\text{TiO}_2$ , additional calculations are performed. The results suggest that the work function for F-decorated rutile  $\text{TiO}_2$  is 3.309 eV, which is very close to the value (3.241 eV) for pure rutile  $\text{TiO}_2$ . As a result, the bottom of the conduction band of F-decorated rutile  $\text{TiO}_2$  should be lower than that of ideal rutile  $\text{TiO}_2$  by about 0.068 eV. Although this value is small, the SDH mechanism should be also applicable for F-decorated rutile  $\text{TiO}_2$ .



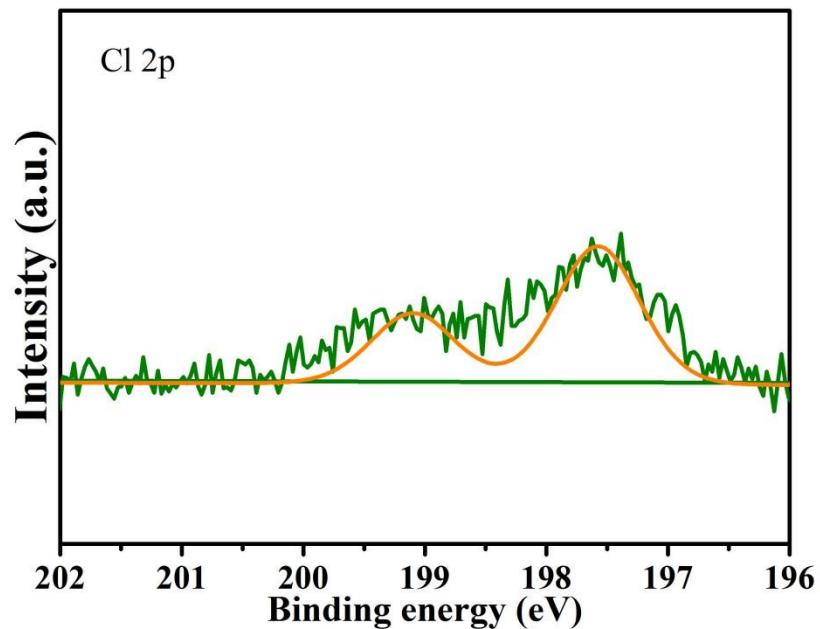

Figure S21. XPS spectrum of Cl 2p for RT-HCl.

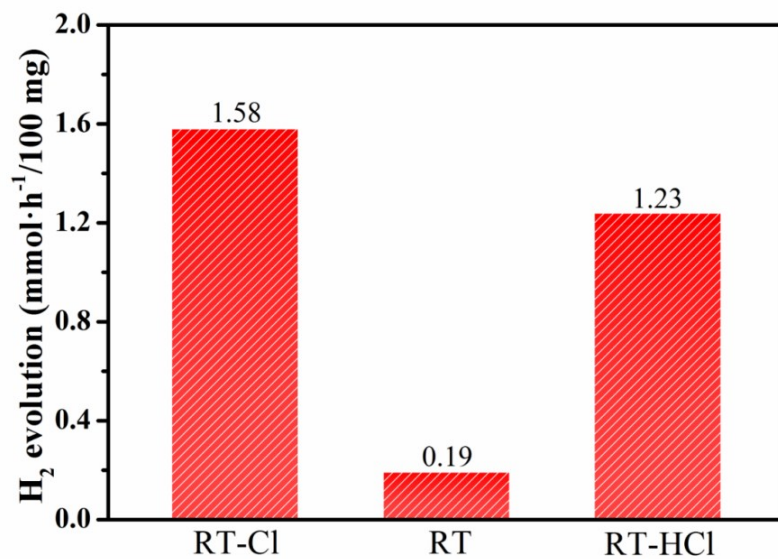

Figure S22. Photocatalytic hydrogen rates of RT, RT-Cl and RT-HCl samples, respectively.

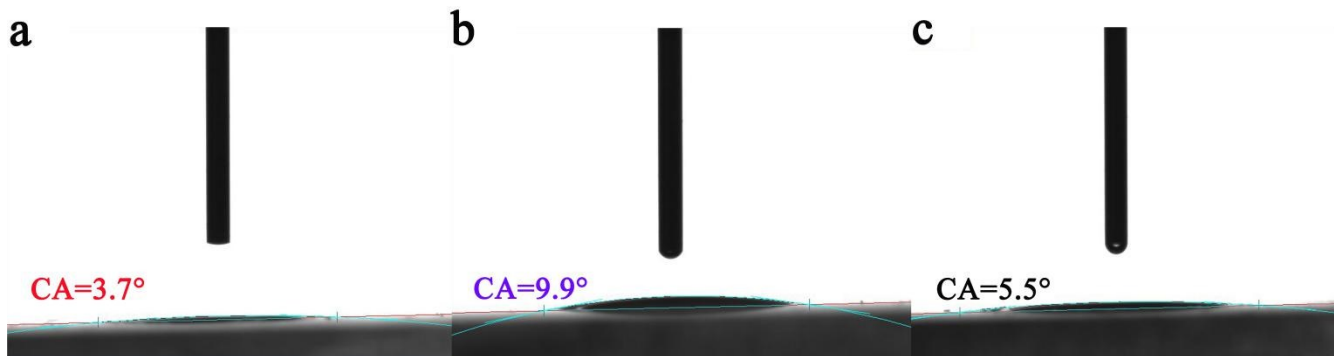

**Figure S23.** Water contact angles (CA) of RT-Cl (a), RT (b) and RT-HCl (c) samples, respectively.

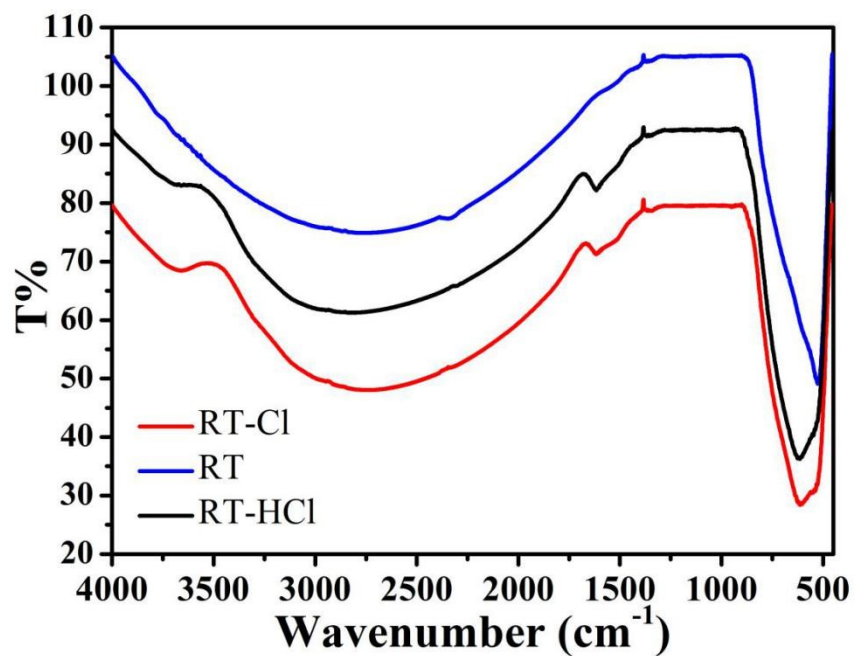

**Figure S24.** FT-IR spectra of RT, RT-Cl and RT-HCl, respectively.

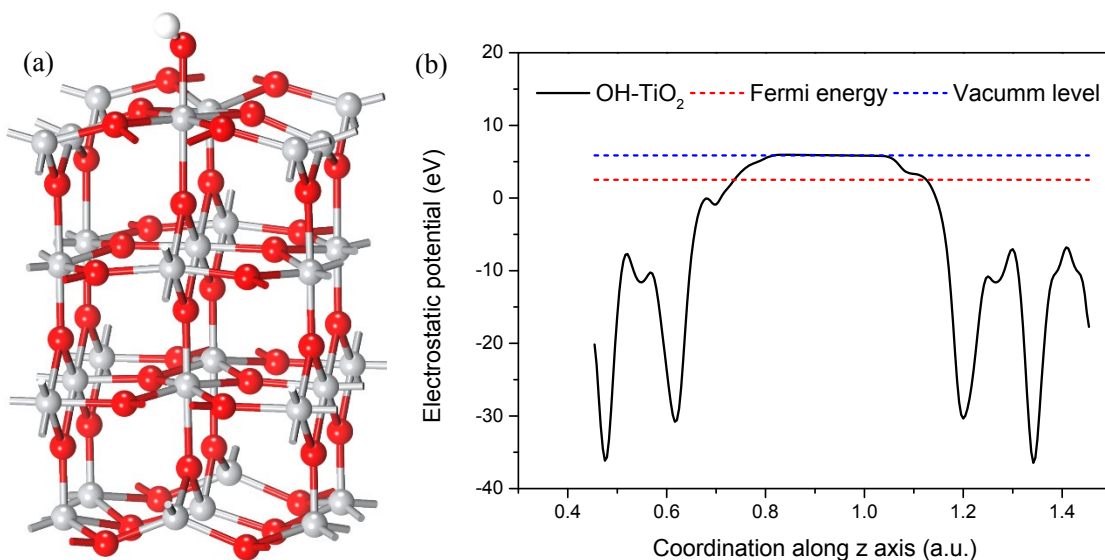

**Figure S25.** Optimized structure for OH-decorated rutile  $\text{TiO}_2$  surface (a) and the electrostatic potential along z axis (b).

To evaluate the effect of hydroxyl group on the band alignment of the system, additional calculations were further performed. It shows the optimized structure with the decoration of hydroxyl group. The work function of this system is calculated to be 3.354 eV. Although this value is slightly larger than that of pure rutile  $\text{TiO}_2$  (3.241 eV), a large step (0.182 eV) between OH-decorated and Cl-decorated  $\text{TiO}_2$  components is still remained. Therefore, the introduction of OH group should not affect the present results.

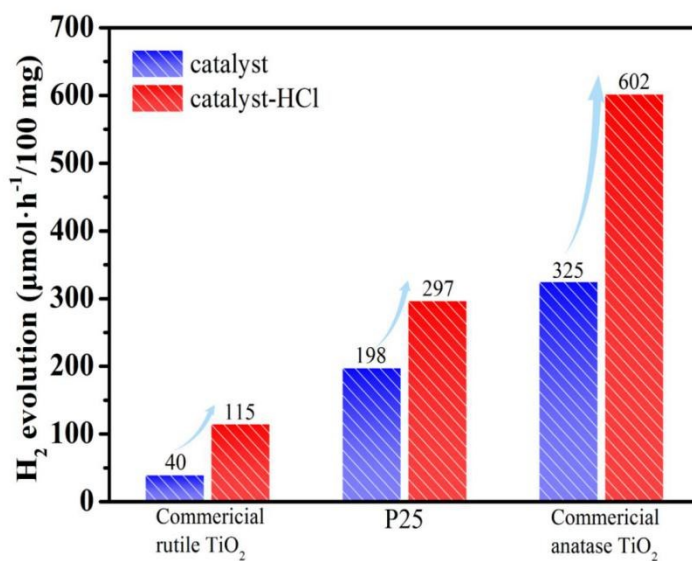

**Figure S26.** Comparison of hydrogen evolution rate (AM 1.5G) for different commercial photocatalysts with (Catalyst-HCl) and without (Catalyst) HCl hydrothermal reaction.

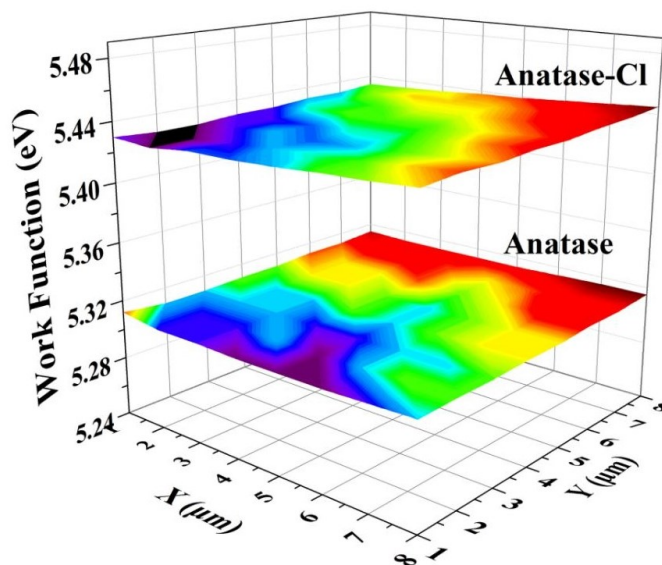

**Figure S27.** SKP maps of anatase TiO<sub>2</sub>-Cl and pure anatase TiO<sub>2</sub>.

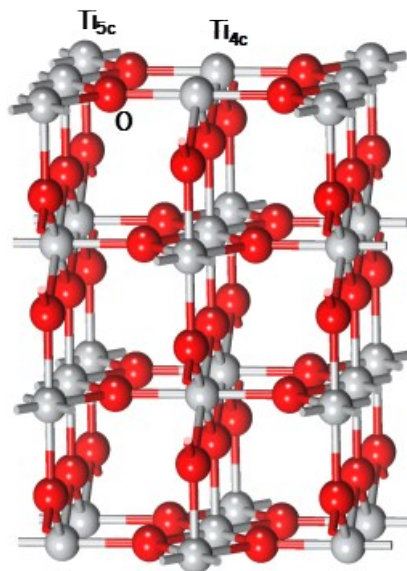

**Figure S28.** Scheme of 4-coordinated Ti (Ti<sub>4c</sub>) and 5-coordinated Ti sites (Ti<sub>5c</sub>) for ideal rutile TiO<sub>2</sub> (110) surface.

**Table S1.** The lattice parameters and structure parameters of RT and RT-Cl.

| parameters                                         | RT-Cl                  | RT                     |
|----------------------------------------------------|------------------------|------------------------|
| Lattice constant (Å)                               | a=b=4.5882<br>c=2.9568 | a=b=4.5790<br>c=2.9592 |
| Cell volume (Å <sup>3</sup> )                      | 62.2453                | 62.0463                |
| BET surface area (m <sup>2</sup> g <sup>-1</sup> ) | 39.3                   | 38.3                   |
| Pore size (nm)                                     | 10.9                   | 11.2                   |
| Pore volume (cm <sup>3</sup> g <sup>-1</sup> )     | 0.10                   | 0.11                   |

**Table S2.** Apparent quantum efficiency for different samples.

|        | 365 nm | 420 nm | 520 nm |
|--------|--------|--------|--------|
| RT-Cl  | 75.2%  | 9.40%  | 1.24%  |
| RT     | 9.01%  | 1.12%  | 0.14%  |
| RT-HCl | 60.9%  | 7.60%  | 0.96%  |

**Table S3.** Comparison of different rutile TiO<sub>2</sub> photocatalysts for hydrogen evolution.

| Photocatalysts          | H <sub>2</sub> activity<br>( $\mu\text{mol}\cdot\text{h}^{-1}/100\text{ mg}$ ) | Light source              | Reaction<br>system     | References |
|-------------------------|--------------------------------------------------------------------------------|---------------------------|------------------------|------------|
| Rutile TiO <sub>2</sub> | 536.6                                                                          | UV-vis                    | 10% CH <sub>3</sub> OH | [1]        |
| Rutile TiO <sub>2</sub> | 144                                                                            | UV                        | 10% CH <sub>3</sub> OH | [2]        |
| Rutile TiO <sub>2</sub> | 115                                                                            | Xe lamp,300<br>W          | 20% CH <sub>3</sub> OH | [3]        |
| Rutile TiO <sub>2</sub> | 270                                                                            | Xe lamp,300<br>W          | 20% CH <sub>3</sub> OH | [4]        |
| Rutile TiO <sub>2</sub> | 331                                                                            | 400< $\lambda$ <625<br>nm | 20% CH <sub>3</sub> OH | [5]        |
| Rutile TiO <sub>2</sub> | 770                                                                            | UV                        | 50% CH <sub>3</sub> OH | [6]        |
| Rutile TiO <sub>2</sub> | 460                                                                            | Xe lamp,300<br>W          | 20% CH <sub>3</sub> OH | [7]        |
| Rutile TiO <sub>2</sub> | 215.7                                                                          | Xe lamp,300<br>W          | 20% CH <sub>3</sub> OH | [8]        |
| Rutile TiO <sub>2</sub> | 18.1                                                                           | $\lambda$ >400 nm         | 25% CH <sub>3</sub> OH | [9]        |
| Rutile TiO <sub>2</sub> | 140                                                                            | $\lambda$ >420 nm         | 20% CH <sub>3</sub> OH | [10]       |
| Rutile TiO <sub>2</sub> | 1200                                                                           | Xe lamp,300<br>W          | 20% CH <sub>3</sub> OH | [11]       |
| Rutile TiO <sub>2</sub> | 900                                                                            | Xe lamp,300<br>W          | 30% CH <sub>3</sub> OH | [12]       |
| Rutile TiO <sub>2</sub> | 245                                                                            | $\lambda$ >400 nm         | 40% CH <sub>3</sub> OH | [13]       |
| Rutile TiO <sub>2</sub> | 160                                                                            | Xe lamp,300<br>W          | 1 M CH <sub>3</sub> OH | [14]       |
| Rutile TiO <sub>2</sub> | 600                                                                            | Xe lamp,300<br>W          | 20% CH <sub>3</sub> OH | [15]       |

|                               |             |                |                             |                  |
|-------------------------------|-------------|----------------|-----------------------------|------------------|
| Rutile TiO <sub>2</sub>       | 250         | AM 1.5G        | 50% CH <sub>3</sub> OH      | [16]             |
| <b>Rutile TiO<sub>2</sub></b> | <b>1590</b> | <b>AM 1.5G</b> | <b>20% CH<sub>3</sub>OH</b> | <b>This work</b> |

## References

- [1] Y. Yang , G. Liu , T. S. John, H. Cheng, *Adv. Mater.* **2016**, *28*, 5850.
- [2] C. Gao, T. Wei, Y. Zhang, X. Song, Y. Huan, H. Liu, M. Zhao, J. Yu, X. Chen, *Adv. Mater.* **2019**, *31*, 1806596.
- [3] Y. Zhang, Z. Xu, G. Li, X. Huang, W. Hao, Y. Bi, *Angew. Chem. Int. Ed.* **2019**, *58*, 14229.
- [4] H. Xiong, L. Wu, Y. Liu, T. Gao, K. Li, Y. Long, R. Zhang, L. Zhang, Z. Qiao, Q. Huo, X. Ge, S. Song, H. Zhang, *Adv. Energy Mater.* **2019**, 1901634.
- [5] T. D. Phan, S. Luo, D. Vovchok, J. Llorca, J. Graciani, J. F. Sanz, S. Sallis, W. Xu, J. Bai, F. J. Piper, D. E. Polyansky, E. Fujita, S. D. Senanayake, D. J. Stacchiola, J. Rodriguez, *ACS Catal.* **2016**, *6*, 407.
- [6] F. Amano, M. Nakata, Y. Akira, T. Tanakabc, *Catal. Sci. Technol.* **2016**, *6*, 5693.
- [7] Q. Xu, Y. Ma, J. Zhang, X. Wang, Z. Feng, *J. Catal.* **2011**, *278*, 329.
- [8] Q. Zhang, R. Li, Z. Li, A. Li, S. Wang, Z. Liang, S. Liao, C. Li, *J. Catal.* **2016**, *337*, 36.
- [9] F. Zuo, K. Bozhilov, R. J. Dillon, L. Wang, P. Smith, X. Zhao, C. Bardeen, P. Feng, *Angew. Chem. Int. Ed.* **2012**, *51*, 6223.
- [10] Z. Zhao, H. Tan, H. Zhao, Y. Lv, L. Zhou, Z. Sun, *Chem. Commun.* **2014**, *50*, 2755.
- [11] R. Li, Y. Weng, X. Zhou, X. Wang, Y. Mi, R. Chong, H. Han, C. Li, *Energy Environ. Sci.* **2015**, *8*, 2377.
- [12] X. Zheng, Q. Kuang, K. Yan, Y. Qiu, J. Qiu, S. Yang, *ACS Appl. Mater. Interfaces.* **2013**, *5*, 11249.
- [13] Y. Yang, Y. Yao, L. He, Y. Zhong, Y. Ma, J. Yao, *J. Mater. Chem. A.* **2015**, *3*, 10060.
- [14] R. J. Ramalingam, T. Radhika, P. R. Ranjan, R. M. Sayed, H. A. Al-lohedan, A. M.



Moydeen, D. M. Al-dhayan, *Int. J. hydrogen energy* **2019**, *44*, 23959.

[15] W. Jiao, Y. Xie, R. Chen, C. Zhen, G. Liu, X. Ma, H. Cheng, *Chem. Commun.* **2013**, *49*, 11770.

[16] N. Y. Kim, H. K. Lee, J. T. Moon, J. B. Joo, *Catalysts* **2019**, *9*, 491.

**Table S4.** Comparison of hydrogen evolution for different Pt loading amounts on TiO<sub>2</sub>.

| Photocatalysts                  | Pt loading amounts (wt%) | H <sub>2</sub> activity (μmol·h <sup>-1</sup> /100 mg) | Light source   | Reaction system        | References |
|---------------------------------|--------------------------|--------------------------------------------------------|----------------|------------------------|------------|
| Rutile-Anatase TiO <sub>2</sub> | 0.6                      | 1000                                                   | AM 1.5G        | 50% CH <sub>3</sub> OH | [1]        |
| Rutile TiO <sub>2</sub>         | 1                        | 400                                                    | Xe lamp, 300 W | 10% CH <sub>3</sub> OH | [2]        |
| Rutile TiO <sub>2</sub>         | 1                        | 181                                                    | λ>400 nm       | 25% CH <sub>3</sub> OH | [3]        |
| Rutile TiO <sub>2</sub>         | 0.5                      | 258                                                    | AM 1.5G        | 25% CH <sub>3</sub> OH | [4]        |
| Anatase TiO <sub>2</sub>        | 3                        | 750                                                    | AM 1.5G        | 20% CH <sub>3</sub> OH | [5]        |
| Degussa P25                     | 1                        | 561                                                    | Uv-vis         | 10% CH <sub>3</sub> OH | [6]        |
| Anatase TiO <sub>2</sub>        | 0.6                      | 845                                                    | Xe             | 20%                    | [7]        |

|                               |             |             |                |                                       |                  |
|-------------------------------|-------------|-------------|----------------|---------------------------------------|------------------|
|                               |             |             | lamp,300       | CH <sub>3</sub> OH                    |                  |
|                               |             |             | W              |                                       |                  |
|                               |             |             | Xe             |                                       |                  |
| Anatase TiO <sub>2</sub>      | 0.54        | 217         | lamp,300       | 10%                                   | [8]              |
|                               |             |             | W              | TEOA                                  |                  |
|                               |             |             | Xe lamp,       | 20%                                   |                  |
| Anatase TiO <sub>2</sub>      | 0.5         | 811         | λ=420          | CH <sub>3</sub> OH                    | [9]              |
|                               |             |             | nm             |                                       |                  |
|                               |             |             | Xe             |                                       |                  |
| Rutile-Anatase                |             |             | lamp,300       | 10%                                   |                  |
| TiO <sub>2</sub>              | 1           | 420         | W              | CH <sub>3</sub> OH                    | [10]             |
|                               |             |             |                |                                       |                  |
| <b>Rutile TiO<sub>2</sub></b> | <b>0.15</b> | <b>1590</b> | <b>AM 1.5G</b> | <b>20%</b><br><b>CH<sub>3</sub>OH</b> | <b>This work</b> |

## References

- [1] X. Chen, L. Liu, P. Y. Yu, S. S. Mao, *Science* **2011**, *331*, 746.
- [2] L. Li, J. Yan, T. Wang, Z. Zhao, J. Zhang, J. Gong, N. Guan, *Nat. Commun.* **2015**, *6*, 5881.
- [3] F. Zuo, K. Bozhilov, R. J. Dillon, L. Wang, P. Smith, X. Zhao, C. Bardeen, P. Feng, *Angew. Chem. Int. Ed.* **2012**, *124*, 6223.
- [4] C. Yang, Z. Wang, T. Lin, H. Yin, X. Lv, D. Wan, T. Xu, C. Zheng, J. Lin, F. Huang, X. Xie, M. Jiang, *J. Am. Chem. Soc.* **2013**, *135*, 17831.
- [5] O. Elbanna, M. Zhu, M. Fujitsuka, T. Majima, *ACS Catal.* **2019**, *4*, 3618.
- [6] L. Ye, K. H. Chu, B. Wang, D. Wu, H. Xie, G. Huang, H. Y. Yipa, P. K. Wong, *Chem. Commun.* **2016**, *52*, 11657.
- [7] Y. Sui, S. Liu, T. Li, Q. Liu, T. Jiang, Y. Guo, J. Luo, *J. Catal.* **2017**, *353*, 250.
- [8] X. Tan, J. Zhang, D. Tan, J. Shi, X. Cheng, F. Zhang, L. Liu, B. Zhang, Z. Su, B. Han, *Nano Res.* **2019**, *12*, 1967.

[9] Y. Yang, P. Gao, X. Ren, L. Sha, P. Yang, J. Zhang, Y. Chen, L. Yang, *Appl. Catal. B: Environ.* **2017**, *218*, 751.

[10] X. An, C. Hu, H. Liu, J. Qu, *Langmuir* **2018**, *34*, 1883.

**Table S5.** Positron Lifetime Parameter of the rutile TiO<sub>2</sub> catalysts.

| Sample | $\tau_1$ (ps) | $\tau_2$ (ps) | $\tau_3$ (ps) | I <sub>1</sub> (%) | I <sub>2</sub> (%) | I <sub>3</sub> (%) |
|--------|---------------|---------------|---------------|--------------------|--------------------|--------------------|
| RT-Cl  | 111.6±5.7     | 332.2±2.0     | 974±84        | 12.86±0.55         | 85.90±0.58         | 1.24±0.23          |
| RT     | 133.0±11      | 340.7±7.4     | 706±48        | 19.20±1.60         | 75.70±1.80         | 5.10±1.30          |

**Table S6.** Comparison of hydrogen evolution for different halogen decorated RT photocatalysts under AM 1.5G.

| Photocatalysts | H <sub>2</sub> evolution ( $\mu\text{mol}\cdot\text{h}^{-1}/100\text{ mg}$ ) | Increased ratio |
|----------------|------------------------------------------------------------------------------|-----------------|
| RT             | 190                                                                          | —               |
| RT-F           | 332                                                                          | 75%             |
| RT-Br          | 284                                                                          | 49%             |
| RT-I           | 243                                                                          | 28%             |

**Table S7.** Comparison of hydrogen evolution for different surface chlorine amounts on RT-HCl.

| HCl concentration<br>(mol/L) | Surface chemisorbed chlorine amounts<br>(%) | H <sub>2</sub> activity<br>( $\text{mmol}\cdot\text{h}^{-1}/100\text{ mg}$ ) |
|------------------------------|---------------------------------------------|------------------------------------------------------------------------------|
| 0.1                          | 0.18                                        | 0.48                                                                         |
| 0.2                          | 0.33                                        | 0.92                                                                         |
| 0.3                          | 0.47                                        | 1.23                                                                         |
| 0.4                          | 0.47                                        | 1.23                                                                         |
